# Supplementary material for: In vitro cell culture of patient derived malignant pleural and peritoneal effusions for personalised drug screening
Source: PubMed Central journal article supplement (PMC7149866; doi:10.1186/s12967-020-02331-x), 2020-04-10

Figure S1

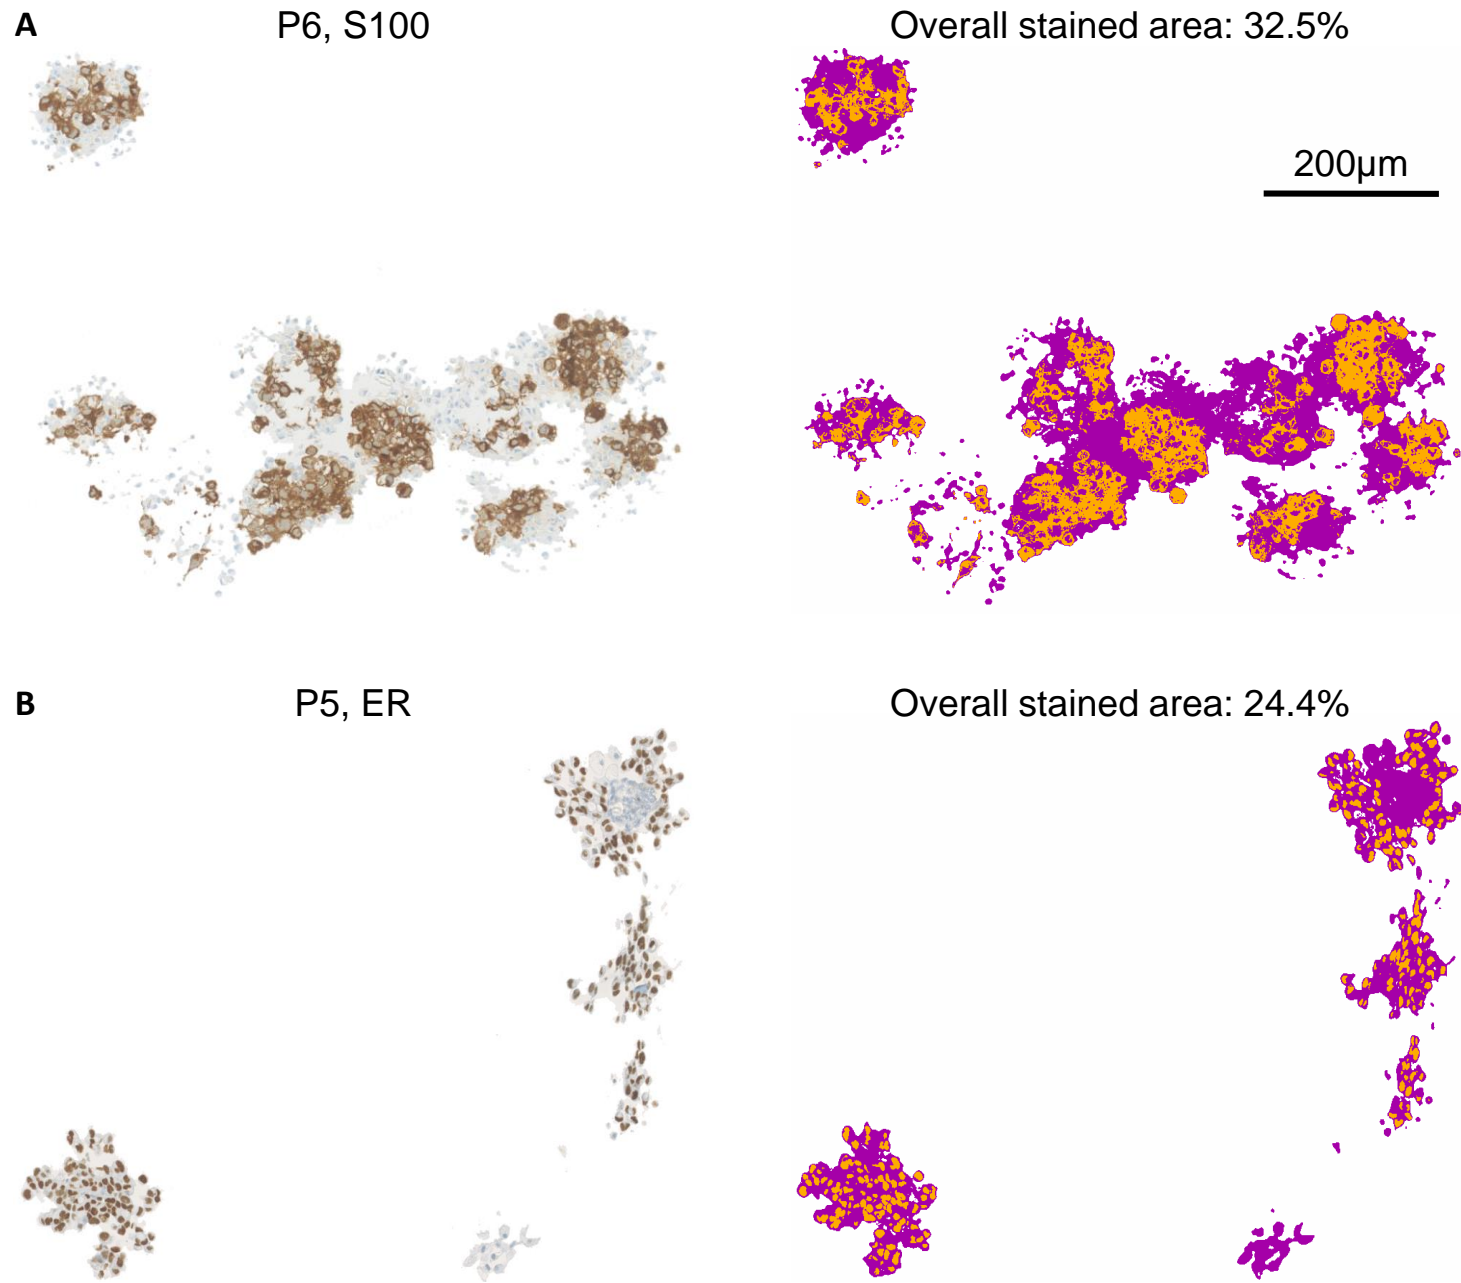

Supplement: 12967_2020_2331_MOESM1_ESM.pdf [file 12967_2020_2331_MOESM1_ESM.pdf]
